# Supplementary material for: An Exploration of the Effects of an Early Postpartum Intravenous Infusion with Carnosic Acid on Physiological Responses of Transition Dairy Cows
Source: MDPI journal article supplement (doi:10.3390/antiox10091478), 2021-09-16
Supplement: s1 [file s1]

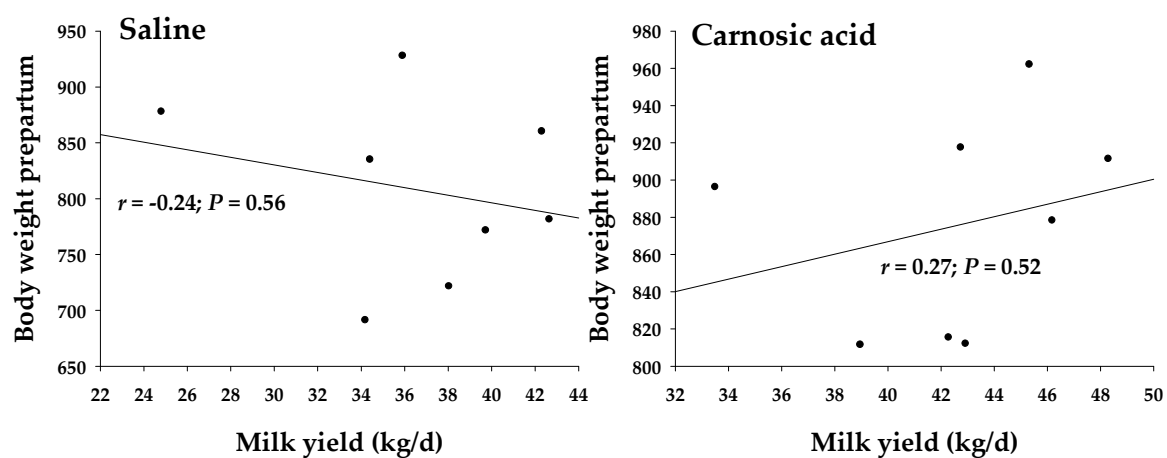

**Figure S1.** Correlation between body weight prepartum and milk yield for peripartal dairy cows infused with 500 mL of sterile saline or carnosic acid at a rate of 0.3 mg/kg BW supplied in a total volume of 500 mL of sterile saline solution.
